# Supplementary material for: Volatilomics of raspberry fruit germplasm by combining chromatographic and direct-injection mass spectrometric techniques
Source: Front Mol Biosci. 2023 Apr 13;10:1155564. doi: 10.3389/fmolb.2023.1155564 (PMC10133483; doi:10.3389/fmolb.2023.1155564)
Supplement: Supplementary file 1 [file Table2.XLSX]

## Sheet: final table
Supp. T2 Volatile organic compounds assessed by SPME/GC-MS expressed as μg/Kg of 2-octanol, for each raspberry cultivar (“Citria”, “Glen Ericht”, “Himbotop”, “Kweli”, “Paris”, and “Tulameen”) at three ripening stages [pink (P), ripe (R), and overripe (Or)]. Each value is the average of three replicates. Two way ANOVA results are reported.
								Citria				Glen Ericht				Himbotop				Kweli				Paris				Tulameen				Anova (p)
Code	Compound	formula	Class	RT	RI Calc.	RI Nist		P	R	OR		P	R	OR		P	R	OR		P	R	OR		P	R	OR		P	R	OR		CV	Stage	CV x stage
Ac_1	Acetic Acid	C2H4O2	Acids	21.276	1598.38	1449		0	1.62833	99.6593		0	0	1.30133		0	0	344.346		0	0	2.363		0.710667	8.984	24.421		0	0	14.4663		7.56527e-27	3.86475e-26	1.63223e-29
Ac_2	Pentanoic acid	C5H10O2	Acids	24.85	1724	1733		0	0	23.443		0	0	0		0.168	0.294	12.988		0.282667	0.322333	0.473667		0.799333	1.01033	1.35033		0	0	1.07467		5.28412e-41	1.18182e-38	1.79859e-42
Ac_3	Hexanoic Acid	C6H12O2	Acids	31.252	1967.81	1846		0.837667	2.11433	276.116		4.165	1.09167	6.26767		0.455	1.343	29.974		0.493667	0.551	4.96633		0.702	0.738333	1.16867		0.544333	0.741333	38.948		4.19827e-40	5.7214e-41	2.97595e-44
Ac_4	Octanoic Acid	C8H16O2	Acids	36.26	2150.82	2060		0.474333	1.11433	7.828		0.543667	0.587667	1.77867		0.283667	0.557333	4.484		0.507	1.048	3.71267		0.586	0.420333	0.802667		0.634	0.722667	4.15867		4.0727e-19	2.32698e-09	1.92933e-10
Ac_5	Nonanoic Acid	C9H18O2	Acids	38.625	2235.72	171		2.17267	1.659	2.37833		0.991	1.84233	0.743667		1.06133	2.09533	1.49833		1.667	1.51467	2.34633		1.88333	1.416	1.886		1.58233	1.75167	1.98233		0.685281	0.380932	0.641271
Ac_6	Decanoic Acid	C10H20O2	Acids	41.037	2322.3	2276		0.801	0.484	1.52667		0.527667	0.996333	0.751667		0.646333	0.857333	0.934333		0.984333	0.685	0.888333		1.14833	0.931	1.63233		0.816333	1.05233	1.14333		0.000831469	0.00702929	0.00897761
Total Acids								4.28567	7	410.951		6.22733	4.518	10.843		2.61433	5.147	394.224		3.93467	4.121	14.7503		5.82967	13.5	31.261		3.577	4.268	61.7733
Ad_1	Butanal	C4H8O	Aldehydes	1.715	879.2	877		0.464333	1.27267	1.29367		0.822667	0.734667	1.96767		0.408333	0.670333	1.66767		0.256	0.626	1.50567		0.591667	0.443	0.780333		0.462	0.638	1.096		1.74958e-16	9.67981e-07	1.62624e-06
Ad_2	2-Methyl Butanal	C5H10O	Aldehydes	2.084	917.071	914		0.082	0.283667	0.093		0.0506667	0.136667	0.909667		0.0936667	0.0756667	0.084		0.177	0.195667	0.24		0.686333	0.783	1.43633		0.208	0.316333	0.305333		9.53238e-12	1.11081e-21	2.68047e-12
Ad_3	3-Methyl Butanal	C5H10O	Aldehydes	2.1	918.214	918		1.041	1.55133	1.497		0.326667	0.405333	1.34533		1.106	1.04367	0.582		6.219	6.86533	8.57967		7.617	12.7633	21.543		3.32667	3.36133	3.82567		3.90278e-14	4.0878e-32	1.41862e-17
Ad_4	Pentanal	C5H10O	Aldehydes	2.988	981.643	979		5.75633	22.747	23.1887		8.10167	9.64533	28.378		6.81467	10.032	33.6163		5.19267	10.2433	21.2373		5.95867	6.818	14.557		6.809	9.33467	20.6667		1.19683e-18	3.39133e-06	1.24189e-06
Ad_5	Hexanal	C6H12O	Aldehydes	5.276	1094.47	1083		131.012	234.234	262.147		76.6867	113.9	179.995		177.219	220.808	39.192		47.2093	52.7783	79.872		156.702	182.22	228.87		82.2523	100.084	171.555		7.88589e-11	2.26036e-20	1.96448e-16
Ad_6	(E)-2-Pentenal	C5H8O	Aldehydes	6.61	1139.97	1127		10.3717	8.50033	4.88067		29.042	30.739	17.4057		2.26867	1.969	0.604		3.07767	1.474	1.32167		12.5923	9.96267	12.7473		17.1483	13.1233	13.1447		7.99341e-14	2.47966e-35	6.99989e-14
Ad_7	Heptanal	C7H14O	Aldehydes	8.325	1196.38	1184		8.311	8.951	8.25167		5.96	8.27967	8.56067		6.52933	6.273	4.403		6.46967	5.23133	7.54933		10.6613	10.8567	21.1797		5.87833	5.133	5.523		1.68107e-09	5.65815e-24	7.51568e-16
Ad_8	(E)-2-Hexenal	C6H10O	Aldehydes	8.851	1212.36	1216		40.7677	17.2183	0		31.462	37.2143	21.0183		16.1033	17.8657	15.27		8.67167	5.54667	5.29967		47.3177	29.944	30.1123		32.428	25.1383	30.22		4.59228e-11	7.82118e-18	2.88683e-10
Ad_9	2-Hexenal	C6H10O	Aldehydes	9.33	1226.6	1213		654.828	697.639	538.427		521.803	479.07	518.717		313.053	279.553	19.835		81.006	57.9	51.961		681.489	458.917	436.383		440.241	321.561	302.38		5.35871e-09	8.34293e-24	6.45825e-06
Ad_10	Octanal	C8H16O	Aldehydes	11.675	1296.29	1289		36.0393	26.2673	27.1937		20.559	29.101	33.9567		23.4267	20.531	14.132		24.5063	19.2087	22.1477		30.8283	30.7813	48.8423		24.8563	20.8673	24.555		0.000592099	1.3579e-14	6.17994e-10
Ad_11	2-Nonanal	C9H18O	Aldehydes	15.065	1397.17	1391		37.4057	26.0223	31.2963		27.9207	39.8743	49.7183		31.2443	30.1243	28.7053		29.795	24.9987	34.878		43.249	44.5467	66.9477		35.33	31.6737	40.54		1.77258e-08	3.41338e-14	1.81171e-07
Ad_12	2-Octenal (E)	C8H14O	Aldehydes	16.113	1430.3	1429		5.70233	0	0		7.61767	7.76533	6.869		4.238	4.377	6.815		4.877	3.18867	4.09033		15.3787	12.3813	21.892		9.51667	8.62267	10.0923		1.49053e-08	4.26768e-28	2.73843e-12
Ad_13	Decanal	C10H20O	Aldehydes	18.355	1501.66	1498		7.746	5.055	8.84633		6.04867	10.312	16.8013		4.09267	4.03633	3.908		4.30567	3.464	4.1		9.88533	8.271	13.9743		9.738	9.23167	12.9597		3.88087e-10	3.09735e-17	1.14094e-07
Ad_14	Benzaldehyde	C7H6O	Aldehydes	18.968	1521.95	1520		7.40767	6.11667	5.53667		6.135	4.72033	4.06467		3.35833	2.706	2.03133		2.20033	1.21867	1.393		5.31667	3.96633	4.87867		3.84833	3.01333	2.17033		2.37179e-05	3.57768e-14	0.674067
Ad_15	Undecanal	C11H22O	Aldehydes	21.453	1604.45	1604		5.38633	2.71633	4.404		0	6.141	3.91733		1.39633	1.36067	1.04333		1.29333	0.860667	0.940333		4.282	2.80233	3.80133		3.35333	3.06867	3.006		0.468128	9.36446e-14	1.4762e-11
Ad_16	3-Ethyl Benzaldehyde	C9H10O	Aldehydes	24.307	1703.91	n.f.		1.20467	0.815667	1.045		0.553	0.564	0.239		0	0	0.0286667		0.0576667	0.0776667	0.121667		0.052	0.0256667	0.1		0.0776667	0.112333	0.150667		0.939434	0.00103104	0.997925
Total Aldehydes								953.526	1059.39	918.101		743.089	778.602	893.864		591.352	601.425	171.918		225.314	193.878	245.237		1032.61	815.482	928.045		675.474	555.279	642.19
Ak_1	3-Methyl-2-Hexene		Alkenes	7.37	1164.97	n.f.		619.876	54.743	24.1503		501.687	601.491	202.284		220.128	205.9	7.516		162.388	96.941	74.582		930.018	504.387	542.478		677.265	488.228	505.105		4.00224e-17	4.65016e-23	5.66957e-12
Total Alkenes								619.876	54.743	24.1503		501.687	601.491	202.284		220.128	205.9	7.516		162.388	96.941	74.582		930.018	504.387	542.478		677.265	488.228	505.105
Al_1	1-pentanol	C5H12O	Alcohols	10.489	1261.04	1250		1.49233	5.18933	5.62033		1.682	1.31367	2.95867		4.69533	12.6827	18.9		2.40933	6.40067	16.4843		1.29667	2.439	6.41667		1.74367	1.90967	5.879		5.83419e-25	4.83227e-26	5.66187e-17
Al_2	2-Heptanol		Alcohols	12.784	1329.29	1320		5.94833	6.20967	9.21033		0	2.68467	2.57367		1.65967	1.84067	3.235		11.8483	16.6917	21.1137		63.993	60.0963	82.0017		6.418	8.33233	7.91333		9.13776e-05	3.3582e-30	0.00100357
Al_3	Hexanol	C6H14O	Alcohols	13.835	1360.57	1355		4.825	18.1077	43.0357		5.026	8.65433	14.847		9.05833	10.5557	1.482		6.04333	14.4383	27.3323		7.02867	13.4087	21.068		5.01267	8.16667	20.954		5.12482e-18	8.65267e-13	2.63e-13
Al_4	trans-3-Hexen-1-ol	C6H12O	Alcohols	14.144	1369.76	1367		0.977	1.55633	3.856		2.517	7.46967	9.79033		4.613	3.936	0.111		1.853	3.55033	5.69667		2.218	4.548	5.10967		3.612	6.91	10.478		2.84831e-07	8.24987e-09	4.27804e-06
Al_5	2,5-dimethylcyclohexanol	C8H16O	Alcohols	14.562	1382.2	n.f.		0	0	2.316		0	0	0		0	0	0.757		0	0	0.136		0	0	0		0	0	0.211		3.82852e-11	9.63528e-10	4.17007e-12
Al_6	cis-3-Hexen-1-ol	C6H12O	Alcohols	14.79	1388.99	1382		28.2987	26.82	27.2053		29.178	44.0357	28.6153		10.2767	7.47367	0.357667		25.9763	23.6837	26.0037		34.7257	40.4837	50.5503		37.794	25.1683	36.909		0.939448	3.20038e-16	4.92406e-05
Al_7	(Z)-2-Hexen-1-ol	C6H12O	Alcohols	15.531	1411.8	1416		12.462	21.9347	24.6437		8.82367	13.9317	17.6507		8.50067	5.42	0		4.25067	7.61267	7.53733		4.45367	6.78633	5.748		8.826	9.16833	8.49067		9.29942e-05	5.91491e-18	8.50411e-08
Al_8	1-octen-3-ol	C8H16O	Alcohols	16.964	1457.36	1450		1.22567	1.67967	1.74267		1.413	1.975	2.26633		1.509	1.514	1.28833		1.10967	0.939	1.48067		4.806	6.868	9.49167		2.73633	3.04167	3.86467		5.77317e-13	1.73421e-31	5.22483e-13
Al_9	1-Heptanol		Alcohols	17.085	1461.21	1453		2.36833	2.71767	2.915		1.73967	3.186	3.52333		2.367	1.95267	1.48567		2.70767	2.88267	3.685		0.997	0.917	1.526		1.55433	1.515	2.01433		0.000187367	2.14526e-13	0.000126818
Al_10	2-Ethyl-1-Hexanol	C8H16O	Alcohols	18.177	1495.93	1491		1.75	2.182	3.21767		1.108	2.99833	1.61333		0.979667	1.39833	1.01733		2.147	1.467	3.12033		7.569	3.32333	4.04067		0.554667	0.539667	0.795667		0.048911	1.00498e-19	7.67325e-12
Al_11	1-Octanol	C8H18O	Alcohols	20.214	1563.21	1557		4.97967	5.66767	13.0253		3.199	8.96433	7.01767		4.48667	4.38067	6.11		4.50767	4.96433	8.013		3.35167	3.309	5.045		3.15533	3.218	5.53633		2.83593e-12	3.98671e-10	5.09976e-08
Total Alcohols								64.327	92.0647	136.788		54.6863	95.2133	90.8563		48.146	51.1543	34.744		62.853	82.6303	120.603		130.439	142.179	190.998		71.407	67.9697	103.046
E_1	Methyl Acetate	C3H6O2	Esters	1.4	828.8	828		0.489333	1.55333	3.331		0.793	0.704667	1.597		1.38767	2.40967	4.14767		0.583333	0.748667	1.84367		0.580667	2.46467	5.894		0.383333	0.609	9.309		2.47967e-29	1.30648e-19	1.13716e-22
E_2	Ethyl Acetate	C4H8O2	Esters	1.816	895.36	888		0.632667	3.01667	53.9307		0.61	0.503333	1.007		1.07133	1.00733	51.1333		1.12833	0.966	2.16533		1.119	21.515	68.1793		0.854667	0.758667	36.4417		2.03723e-34	1.92724e-26	5.32513e-26
E_3	Butyl Acetate	C6H12O2	Esters	5.062	1084.51	1074		1.49367	1.38333	1.68633		0.668667	1.41467	1.54133		0.185	0.217667	0.334		0.298	0.203	1.182		1.11833	1.359	2.07667		1.071	1.05433	1.21867		3.98247e-12	2.3239e-20	5.58294e-07
E_4	Hexanoic Acid, Ethyl ester	C8H16O2	Esters	9.939	1244.7	1233		0.07	0.447667	33.2533		0.059	0.0706667	0.473667		0	0.0773333	2.48867		0	0.0436667	0.832667		0.101	0.103333	0.284333		0	0	10.1243		4.94271e-17	2.21496e-16	4.48224e-19
E_5	Hexyl Acetate	C8H16O2	Esters	11.209	1282.44	1272		0.095	0.491	16.9233		0	0.132	0.653		0.149333	0.179333	0.124667		0.0996667	0.146	0.196667		0.971333	0.390333	1.30433		0.158333	0.217	0.606333		1.34023e-19	4.51381e-23	4.91766e-26
E_6	cis-3-Hexenyl Acetate	C8H14O2	Esters	12.666	1325.77	1315		3.23667	6.32	3.30933		7.495	9.076	14.582		7.867	5.95667	0.864333		3.994	2.11367	1.61033		31.7937	15.9383	54.3387		16.3857	2.24033	3.69		6.15952e-18	2.91912e-37	7.33246e-28
E_7	Octanoic Acid Ethyl Ester	C10H20O2	Esters	16.415	1439.9	1435		0.662	2.53067	4.83433		0.117667	1.77033	1.18633		0.0993333	0.088	0.239333		0.129	0.262	0.775333		0.230333	0.243	0.306667		0.250333	0.301	0.729333		0.0147695	9.04134e-05	0.0950525
E_8	Methyl Salicylate	C8H8O3	Esters	26.137	1770.82	1765		0.323	0.112	0.112333		2.67267	1.76933	0.804		0.0563333	0.0756667	0.103667		0.042	0.0196667	0.0296667		0.690333	0.462333	0.673667		10.3053	5.003	1.259		4.41595e-21	1.66051e-33	8.38226e-26
Total Esters								7.00233	15.8547	117.381		12.416	15.441	21.8443		10.816	10.0117	59.4357		6.27433	4.50267	8.63567		36.6047	42.476	133.058		29.4087	10.1833	63.3783
F_1	2-Pentyl-Furan	C9H14O	Furans	9.839	1241.72	1231		0.373667	0.751	0.697		0	0.456333	1.18367		0.290667	0.302	0.163		0.150333	0.115333	0.157		0.632	0.920333	1.21767		0.34	0.418667	0.619667		6.66932e-15	3.92752e-20	1.35322e-13
Total Furans								0.373667	0.751	0.697		0	0.456333	1.18367		0.290667	0.302	0.163		0.150333	0.115333	0.157		0.632	0.920333	1.21767		0.34	0.418667	0.619667
H_1	Octane		Hydrocarbons	1.216	798.841	800		4.311	8.789	1.44233		7.83967	4.21433	8.72033		1.00367	0.603333	0.468		0.746333	0.580667	0.816333		22.5197	16.4017	17.8303		1.938	2.14367	4.68967		0.0726221	1.50221e-27	1.07927e-08
H_2	Naphtalene	C10H8	Hydrocarbons	25.256	1738.61	1746		0.267667	2.19933	5.053		0.361	0.529667	1.654		0.304	0.658667	2.26633		0.851333	1.99467	4.037		0.102	0.283	0.463667		0.296333	0.719	2.02433		4.59073e-16	2.10724e-12	4.02007e-07
Total Hydrocarbons								4.57867	10.9883	6.49533		8.20067	4.744	10.3743		1.30767	1.262	2.73433		1.59767	2.57533	4.85333		22.6217	16.6847	18.294		2.23433	2.86267	6.714
K_1	Acetone	C3H6O	Ketones	1.33	817.6	819		0.485333	1.47633	1.35867		0.572667	0.476	1.26233		0.731	0.859667	2.28		0.391	0.317333	0.556333		1.40367	1.79367	1.54633		0.498333	0.264333	0.213		1.37855e-10	1.77987e-18	1.86538e-11
K_2	4-methyl-2-pentanone	C6H12O	Ketones	3.511	1012.37	1010		0.088	0.382667	0		0.088	0.147333	0.363667		0.444333	0.482	0.0293333		0.345	0.378	0.376333		0.718667	1.10067	1.964		0.142333	0.663	0.263		6.95979e-20	2.91795e-38	2.33993e-29
K_3	2-Heptanone	C7H14O	Ketones	8.218	1192.86	1182		4.22933	37.6957	224.757		4.456	2.19267	15.7177		33.2833	97.6113	228.726		13.0347	55.9997	191.894		3.675	8.95867	29.694		3.66933	6.284	60.049		1.95643e-30	1.09598e-26	3.9856e-22
K_4	1-octen-3-one	C8H14O	Ketones	12.1	1308.93	1300		1.04567	0.42	0.725		1.401	1.75433	1.243		0.830667	0.822	0.558333		0.676667	0.332333	0.459667		4.22367	6.37833	8.60667		2.35	1.87467	1.876		0.00116874	4.20031e-29	3.98393e-12
K_5	6-methyl-5-hepten-2-one	C8H14O	Ketones	13.269	1343.72	1338		2.88333	3.008	6.10567		3.359	3.59267	5.13233		1.31433	2.08567	1.82967		2.35033	1.65833	3.04333		1.20033	1.084	1.65633		3.951	1.459	2.69533		9.07103e-19	8.30269e-27	2.71513e-18
K_6	2-Nonanone	C9H18O	Ketones	14.891	1391.99	1390		0.487667	10.673	290.285		1.786	0.72	3.50667		2.98233	17.917	84.7617		0.513333	8.75667	46.7617		0.202	0.312667	0.261333		0.428	0.445333	6.331		2.06511e-40	4.98981e-40	1.49445e-42
K_7	5-Nonen-2-one	C9H16O	Ketones	16.177	1432.34	1436		0	9.21833	55.834		0	2.73367	2.669		1.56967	1.79867	3.41733		0	0	2.94		4.52533	4.04233	6.17833		2.947	2.87533	13.248		1.58758e-31	1.18649e-33	1.53822e-34
K_8	2-Undecanone	C11H22O	Ketones	21.339	1600.49	1598		0	3.84767	64.3513		1.014	0	2.40667		1.477	3.73833	21.6777		1.32033	2.58633	2.94933		0	1.275	3.153		0	2.01967	8.88		6.83006e-24	2.00758e-22	7.63651e-25
K_9	Acetophenone	C8H8O	Ketones	22.683	1647.23	1647		3.43733	4.53733	3.93867		2.11	2.02167	1.75633		4.30367	5.08333	6.856		1.253	1.29567	1.65767		11.428	15.1173	21.132		2.235	3.57767	3.22633		1.89143e-10	5.05428e-32	4.1634e-12
K_10	1,4-Cyclohex-2-enedione	C6H6O2	Ketones	25.108	1733.2	n.f.		2.29033	1.78633	1.577		1.95967	2.166	0.990333		0.307	0.342667	0.311333		0.399	0.330667	0.364333		0.918667	0.693	0.883333		0.801	0.679667	0.729667		0.29092	6.02809e-07	0.683583
K_11	Geranyl Acetone	C13H22O	Ketones	28.388	1855.56	1859		1.03733	1.17067	8.20267		1.16867	1.18933	1.67267		0.794333	1.09433	1.598		1.251	1.049	1.16367		0.657	1.145	0.968		1.42767	1.238	1.928		4.79964e-22	3.09075e-23	3.58726e-26
Total Ketones								15.9843	74.216	657.135		17.915	16.9937	36.7207		48.0377	131.835	352.045		21.5343	72.704	252.166		28.9523	41.9007	76.0433		18.4497	21.3807	99.4393
L_1	Butyrolactone	C5H10O	Lactones	21.912	1620.42	1632		5.296	3.517	4.763		4.752	6.681	3.323		0.992667	1.82733	3.249		1.66733	2.48233	4.29233		1.14467	1.491	2.547		1.46133	2.113	5.51167		6.19365e-05	6.69736e-10	2.15701e-06
L_2	γ-Caprolactone	C6H10O2	Lactones	24.019	1693.7	1694		0	0	3.89567		0	0	0.279333		0	0	1.00033		0	0	0.165667		0	0	0		0	0	0.763333		3.00879e-15	1.44882e-12	3.02994e-15
L_3	delta Octalactone	C8H14O2	Lactones	30.951	1955.82	1976		0	1.02933	20.905		0.829667	0.126	1.406		0.187333	0.771333	6.49667		0.0843333	0.341667	1.425		0	0	0.0953333		0.104667	0.351667	6.45567		8.80563e-16	1.63002e-12	1.38792e-14
L_4	delta Decalactone	C10H18O2	Lactones	36.257	2150.71	2194		0.0546667	1.716	17.726		0.84	0.150333	4.22933		0.818	2.21633	7.94167		0.483667	1.206	4.06567		0.351	0.245333	0.429667		0.748	1.14233	10.817		6.22101e-09	0.00091682	0.000425918
Total Lactones								5.35067	6.26233	47.2897		6.42167	6.95733	9.23767		1.998	4.815	18.6877		2.23533	4.03	9.94867		1.49567	1.73633	3.072		2.314	3.607	23.5477
M_1	alpha Pinene	C10H16	Monoterpenes	3.698	1021.07	1028		0.839667	55.7383	691.945		0.996667	0.478333	3.099		22.304	92.5317	401.282		0.761667	0.766	1.27467		1.81333	30.772	148.314		1.993	3.87433	326.036		3.68388e-28	1.21396e-22	1.39337e-23
M_2	Camphene	C10H16	Monoterpenes	4.666	1066.09	1071		0	0.281	3.901		0	0.870667	1.18233		0.210667	0.431	1.95067		0	0	0		0	0.396	0.664333		3.51767	2.92667	1.77367		1.05775e-11	3.20736e-20	2.85489e-16
M_3	2-Beta-Pinene	C10H16	Monoterpenes	5.625	1107.57	1112		0	4.319	55.8293		0	0	0		2.014	5.746	26.9963		0	0	0		0	4.06233	10.3607		0.980333	1.583	21.7937		1.93389e-40	6.33604e-36	2.63711e-37
M_4	alpha Phellanderene	C10H16	Monoterpenes	7.511	1169.61	1167		0	8.06267	401.962		0	0	0.23		5.83233	39.648	238		0	0.157667	0.0973333		0	3.17833	26.689		0	0.384333	134.499		4.11874e-26	6.12064e-22	5.77284e-24
M_5	Beta Myrcene	C10H16	Monoterpenes	7.651	1174.21	1161		0	5.17567	221.193		0	0	1.228		3.413	19.3793	80.3543		0	0	0		0	0	8.94033		0	0	69.023		1.44126e-34	1.17056e-31	3.5894e-34
M_6	Alpha Terpinene	C10H16	Monoterpenes	7.96	1184.38	1180		0	0.706	40.143		0	0	0.211333		0.241667	1.65167	9.73067		0.107	0.226333	0.225333		0	0.267	1.29933		0	0	5.43233		1.86806e-21	5.06708e-21	7.74119e-24
M_7	Limonene	C10H16	Monoterpenes	8.553	1203.51	1200		0.610333	4.68433	69.927		0	0.605	1.16667		0.98	5.479	27.2163		0.37	1.01133	1.296		4.619	7.80267	13.8097		0.461333	0.476	25.5283		5.05806e-40	3.05294e-35	1.29324e-37
M_8	beta Phellandrene	C10H16	Monoterpenes	8.847	1212.24	1211		0.707333	6.32467	398.204		0	0	0.621		3.572	20.798	183.866		0.176333	0.194333	0.241667		0.941	3.37633	21.0103		0	0.728333	81.9707		1.77639e-30	1.5116e-27	3.406e-30
M_9	gamma Terpinene	C10H16	Monoterpenes	10.137	1250.58	1246		0.00466667	0.885667	42.8537		0	0	0		0.243	2.05233	15.9123		0.109333	0.334	0.49		0	0.363	2.23767		0	0	8.06867		3.1588e-25	6.65632e-23	1.36173e-25
M_10	o-Cymene	C10H14	Monoterpenes	10.948	1274.68	1275		0.235333	7.11933	208.026		0.8	0.327	0.715333		1.69233	12.0457	70.3227		0.189	0.326333	0.328333		0.456667	4.664	21.9183		0.135	0.273	57.845		6.53363e-29	1.3084e-25	3.83674e-28
M_11	alpha Terpinolene	C10H16	Monoterpenes	11.306	1285.32	1283		0.736667	2.985	31.2747		0.809667	0.615	1.141		0.400333	1.86667	11.618		0.216333	0.285333	0.281		1.484	3.54733	8.267		0.319667	0.404667	10.35		1.06369e-21	1.8712e-17	1.01254e-18
M_12	Linalool	C10H17O	Monoterpenes	19.949	1554.44	1547		10.5347	23.2623	18.014		37.699	30.1373	59.8067		7.35567	12.4293	40.0603		8.25867	16.5417	25.22		18.1437	17.3433	20.995		14.9023	10.26	45.265		1.38616e-10	9.63837e-10	4.47296e-05
M_13	4-Terpineol	C10H17O	Monoterpenes	21.343	1600.63	1602		0	2.60733	93.7833		0	0	0		1.184	5.22033	33.3127		0.544667	1.35667	1.41833		0	1.31033	5.58567		0.222	0.489333	16.2213		1.28522e-28	1.13896e-26	2.32474e-29
M_14	alpha Terpineol	C10H17O	Monoterpenes	24.11	1696.87	1697		1.09367	4.906	21.9957		4.56467	3.919	8.314		0.812333	1.94533	7.04667		0.503667	1.03767	2.36067		1.168	1.47933	2.453		1.58267	1.165	7.471		1.11418e-09	3.05236e-07	3.52697e-06
M_15	delta Cadinene	C15H24	Monoterpenes	25.668	1753.67	1758		0	0.792333	8.89067		0.113667	0	0.291667		0	0	0		0.250667	0.237333	0.947		0.107	0.549	1.1		0	0	1.293		3.6003e-16	4.21541e-17	1.27684e-18
M_16	Geraniol	C10H18O	Monoterpenes	28.341	1853.77	1847		0.184667	0.578333	2.25133		0.503	0.552333	1.43933		0.354667	0.568667	2.13433		0.301667	0.971333	1.94933		0.365333	0.562	0.638667		0.471	0.514333	2.03333		1.3395e-16	0.00194277	9.37157e-05
Total Monoterpenes								14.947	128.428	2310.19		45.4867	37.5047	79.4463		50.61	221.793	1149.8		11.789	23.446	36.1297		29.098	79.673	294.283		24.585	23.079	814.604
N_1	Theaspirane	C13H22O	Norisoprenoids	18.174	1495.83	1499		2.72033	8.30933	10.4257		0	0	0		2.44367	3.92367	5.69633		0	0	2.54067		5.48833	2.919	3.703		0.560333	0.787333	2.28867		2.06027e-16	7.28314e-29	1.48421e-17
N_2	Cycloionone	C13H20O	Norisoprenoids	22.036	1624.73			48.7207	290.083	378.553		8.62967	33.038	74.941		92.4517	225.806	524.238		61.931	275.576	528.241		63.2623	126.073	190.656		101.465	226.958	596.287		8.72347e-26	9.16456e-20	7.18625e-14
N_3	3,4-didehydro-β-ionone	C13H18O	Norisoprenoids	23.795	1685.91			0.461333	8.345	45.154		0.525667	0.701	7.51233		0.229333	0.769	2.49267		0.427	2.14967	4.29733		0.111333	0.771333	1.47867		0.186	0.634667	2.73433		1.47209e-11	8.20519e-14	3.18267e-13
N_4	Dihydro-alpha-ionone	C13H22O	Norisoprenoids	27.235	1811.47	1833		0	6.61867	26.1083		0.525667	0.05	5.03033		0.187667	2.14567	7.02467		0	0.558333	6.76367		0	0.414	1.098		0	0.203667	7.91167		2.69571e-36	2.14206e-32	1.80952e-30
N_5	Damascenone	C13H18O	Norisoprenoids	27.373	1816.75	1823		2.475	2.028	1.14733		3.213	2.707	1.33233		1.873	1.52367	0.796667		1.58333	1.39033	0.535667		2.09067	2.00633	1.808		3.50267	3.01433	0.971333		3.27747e-16	2.82207e-12	1.40383e-05
N_6	Dihydro-beta-ionone	C13H22O	Norisoprenoids	27.654	1827.5	1842		3.76833	9.834	18.8707		0.643	0.681333	3.13733		13.473	39.3053	44.3033		0.918333	5.014	31.4837		3.44733	2.60367	1.71833		4.39867	11.451	43.077		1.65601e-33	5.62158e-36	5.62439e-28
N_7	alpha Ionone	C13H20O	Norisoprenoids	28.126	1845.54	1840		19.6497	367.565	371.255		14.012	61.5463	287.815		76.2667	146.013	74.815		13.3647	172.03	265.572		14.6133	114.958	186.577		10.0163	58.8213	206.976		8.80235e-37	2.87562e-28	1.9094e-27
N_8	alpha ionol	C13H22O	Norisoprenoids	29.54	1899.62	1897		0	0	0		0	0	5.45867		1.319	2.47233	5.53667		0	0	0		0.534	1.1	1.07833		0.835667	1.29567	5.674		3.74773e-17	1.38827e-16	2.09499e-13
N_9	beta Ionone	C13H20O	Norisoprenoids	30.378	1932.99	1971		77.4713	150.078	207.125		49.5757	121.839	149.465		169.055	268.528	296.328		73.5217	184.442	292.174		77.566	109.757	98.6723		103.619	191.734	357.63		3.16819e-29	1.33534e-26	3.51476e-17
Total Norisoprenoids								155.267	842.86	1058.64		77.1247	220.562	534.692		357.299	690.487	961.231		151.746	641.16	1131.61		167.113	360.603	486.79		224.584	494.9	1223.55
St_1	alpha Copaene	C15H24	Sesquiterpenes	17.869	1486.14	1492		0	0.237667	2.87933		0	0	0		0	0	0		0.0776667	0.0863333	0.388333		0	1.53933	4.05867		0	0	0.238333		3.00325e-18	2.19113e-20	3.66461e-18
St_2	trans Caryophyllene	C15H24	Sesquiterpenes	20.957	1587.81	1595		1.21433	64.2563	483.847		2.697	0	0		0	0	0		0	0	0		14.289	59.244	116.715		0.400667	2.525	106.527		1.51416e-21	1.48574e-23	6.91346e-24
St_3	alpha Humulene	C15H24	Sesquiterpenes	23.041	1659.69	1667		0.249	13.392	107.801		1.062	0.289	1.65533		0	0	0		0	0	0		3.022	12.53	24.401		0.140333	0.867333	25.485		5.06142e-21	1.47305e-22	3.75048e-23
Total Sesquiterpenes								1.46333	77.886	594.527		3.759	0.289	1.65533		0	0	0		0.0776667	0.0863333	0.388333		17.311	73.3133	145.174		0.541	3.39233	132.251
Su_1	Dimethyl sulfide	H2S	Sulfurs	1.075	757.971	754		0.737333	1.539	2.35833		1.076	1.104	2.17733		0.669667	0.882667	1.312		0.436667	0.553667	0.996333		0.293333	0.623	2.11433		0.502333	0.650667	2.26167		3.4075e-16	1.27537e-07	0.000260949
Total Sulfurs								0.737333	1.539	2.35833		1.076	1.104	2.17733		0.669667	0.882667	1.312		0.436667	0.553667	0.996333		0.293333	0.623	2.11433		0.502333	0.650667	2.26167
U_1	Unknown_1		Unidentified	19.115	1526.82			0	0.283333	3.18533		0	0	0.118		0	0	0.133667		0	0	0		0	0	0		0	0	0.133		3.04831e-05	1.59562e-07	4.64787e-08
U_2	Unknown_2		Unidentified	24.683	1717.66			0	5.156	40.3207		0	0	1.75967		0.258	1.94533	10.6887		0	2.81433	8.45533		0	0.733667	2.346		0	0.545	8.282		3.15791e-41	2.3638e-38	4.82473e-39
U_3	Unknown_3		Unidentified	25.627	1752.18			4.356	2.662	2.91433		3.25467	3.53433	1.76733		1.03867	1.05267	0.493		0.967333	0.731333	0.779667		3.37067	2.26467	2.37133		2.44867	1.79967	1.87433		0.0743938	4.33678e-05	0.834848
U_4	Unknown_4		Unidentified	25.808	1758.79			0.911667	5.24467	7.30867		0	0.514667	1.27		1.60067	4.15167	10.019		1.06633	5.26733	10.4397		1.088	2.23067	3.562		1.82333	4.21433	11.6137		4.88025e-25	5.15147e-19	3.26185e-13
U_5	Unknown_5		Unidentified	29.55	1900			2.03833	14.1023	16.8977		0.660667	1.44433	4.469		4.50867	10.3	19.1907		3.47367	12.34	20.0963		2.902	5.42667	8.276		4.54567	9.451	22.272		3.10533e-26	1.93571e-20	5.73016e-13
U_6	Unknown_6		Unidentified	29.748	1907.89			0.0446667	0.112	2.913		0.106	0.0543333	0.195		0.138667	0.903	4.76933		0	0.113667	1.092		0	0	0		0.025	0.0306667	0.718		2.24899e-26	6.55285e-24	2.69977e-23
U_7	Unknown_7		Unidentified	31.249	1967.69			20.2657	13.5207	14.3667		16.5367	16.153	5.25767		2.524	2.716	0.826333		2.50933	1.66733	1.69333		13.4167	8.21	8.24933		9.544	6.59833	7.26867		0.169866	0.000483737	0.919243
Total Unidentified								27.6163	41.081	87.9063		20.558	21.7007	14.8367		10.0687	21.0687	46.1207		8.01667	22.934	42.5563		20.7773	18.8657	24.8047		18.3867	22.639	52.1617
Total compounds								1875.34	2413.07	6372.61		1498.65	1805.58	1910.02		1343.34	1946.08	3199.93		658.348	1149.68	1942.61		2423.79	2112.34	2877.63		1749.07	1698.86	3730.64
